# Supplementary material for: A novel solid-state synthesis route for high voltage Na3V2(PO4)2F3−2yO2y cathode materials for Na-ion batteries
Source: Royal Society of Chemistry journal article supplement (doi:10.1039/d3ta04239a), 2023-01-01
Supplement: d3ta04239a1.pdf [file d3ta04239a1.pdf]

**A novel solid-state synthesis route for the high voltage  $\text{Na}_3\text{V}_2(\text{PO}_4)_2\text{F}_{3-2y}\text{O}_{2y}$   
cathode materials for Na-ion batteries**

**Supplementary information**

*Mainul Akhtar,<sup>a,b</sup> Hafssa Arraghraghi,<sup>a,b</sup> Sylvia Kunz,<sup>a,b</sup> Qingsong Wang,<sup>a,b</sup> and Matteo  
Bianchini<sup>a,b,\*</sup>*

<sup>a</sup> Department of Chemistry, Universität Bayreuth, Universitätsstrasse 30, 95447 Bayreuth  
Germany

<sup>b</sup> Bavarian Center for Battery Technology (BayBatt), Universität Bayreuth, Weiherstrasse 26  
95448 Bayreuth Germany

\*E-Mail: [matteo.bianchini@uni-bayreuth.de](mailto:matteo.bianchini@uni-bayreuth.de)

Pages: S1-S14

**Table S1:** ICSD entries for the structures used for DFT calculations.

| Material                                        | ICSD code                 |
|-------------------------------------------------|---------------------------|
| NaF                                             | 262837                    |
| VOPO <sub>4</sub>                               | 9413                      |
| VPO <sub>4</sub>                                | 36521                     |
| Na <sub>2</sub> CO <sub>3</sub>                 | 12168                     |
| (VO) <sub>2</sub> P <sub>2</sub> O <sub>7</sub> | 88661                     |
| NVPF                                            | 194603                    |
| NVPF <sub>2</sub> O                             | Own data – XRD refinement |
| NVPFO <sub>2</sub>                              | 194604                    |

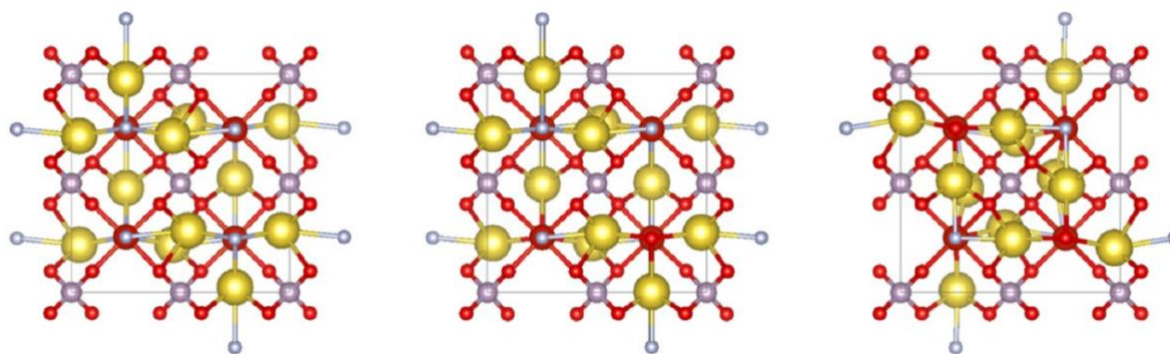

**Figure S1** Crystal structures of NVPF<sub>3-2y</sub>O<sub>2y</sub> used for DFT calculations: (left) NVPF, (middle) NVPF<sub>2</sub>O, (right) NVPFO<sub>2</sub>. The structures are seen in the a-b crystallographic plane (c axis pointing out of the paper). The spheres yellow, purple, light red, dark red and blue represent Na, P, O, V and F, respectively.

**Table S2:** Structural parameters obtained from Rietveld refinement of NVPF.**NVPF**S.G.: *Amam*; Z = 4 $R_{Bragg} = 4.82\%$  $a = 9.0357(1) \text{ \AA}$ ;  $b = 9.0475(1) \text{ \AA}$ ;  $c = 10.74322(8) \text{ \AA}$ ;  $V = 878.27(1) \text{ \AA}^3$ ;  $V/Z = 219.568(4) \text{ \AA}^3$  $R_{wp} = 12.8\%$  $\chi^2 = 14.0$ 

## atomic position

| atoms | Wyckoff position | atomic position |           |            | occ     | $B_{iso}$ |
|-------|------------------|-----------------|-----------|------------|---------|-----------|
|       |                  | $x/a$           | $y/b$     | $z/c$      |         |           |
| V     | 8 g              | 0.25            | 0.2534(3) | 0.18536(9) | 1       | 0.80(1)   |
| P     | 8 e              | 0.00            | 0.000     | 0.2453(4)  | 1       | 0.84(3)   |
| O1    | 16 h             | 0.0973(6)       | 0.0954(7) | 0.1601(4)  | 1       | 1.19(2)   |
| O2    | 16 h             | 0.0916(6)       | 0.4015(7) | 0.1681(4)  | 1       | 0.7(1)    |
| F1    | 4 c              | 0.025           | 0.248(1)  | 0.000      | 1       | 0.48(7)   |
| F2    | 8 g              | 0.025           | 0.7571(8) | 0.1343(2)  | 1       | 1.92(7)   |
| Na1   | 4 c              | 0.075           | 0.019(1)  | 0.0000     | 1       | 4.8(3)    |
| Na2   | 8 f              | 0.5330(8)       | 0.2851(6) | 0.0000     | 0.72(1) | 1.8(2)    |
| Na3   | 8 f              | 0.864(1)        | 0.412(1)  | 0.0000     | 0.31(1) | 3.3(5)    |

**Table S3:** Structural parameters obtained from Rietveld refinement of NVPF<sub>2</sub>O prepared from pyrophosphate source.

| NVPF <sub>2</sub> O                                                                                                                |                  |                 |           |           |                      |           |
|------------------------------------------------------------------------------------------------------------------------------------|------------------|-----------------|-----------|-----------|----------------------|-----------|
| S.G.: $P4_2/mnm$ ; $Z = 4$                                                                                                         |                  |                 |           |           | $R_{Bragg} = 5.79\%$ |           |
| $a = b = 9.04091(6) \text{ \AA}$ ; $c = 10.6699(1) \text{ \AA}$ ; $V = 872.13(1) \text{ \AA}^3$ ; $V/Z = 218.034(3) \text{ \AA}^3$ |                  |                 |           |           | $R_{wp} = 13.3\%$    |           |
|                                                                                                                                    |                  |                 |           |           | $\chi^2 = 39.4$      |           |
| atoms                                                                                                                              | Wyckoff position | atomic position |           |           | occ                  | $B_{iso}$ |
|                                                                                                                                    |                  | $x/a$           | $y/b$     | $z/c$     |                      |           |
| V                                                                                                                                  | 8 j              | 0.2487(3)       | 0.2487(3) | 0.1922(1) | 1                    | 0.99(2)   |
| P1                                                                                                                                 | 4 d              | 0               | 0.5       | 0.25      | 1                    | 1.3(2)    |
| P2                                                                                                                                 | 4 e              | 0               | 0         | 0.2563(6) | 1                    | 0.6(1)    |
| O1                                                                                                                                 | 16 k             | 0.0954(7)       | 0.4069(7) | 0.1637(6) | 1                    | 0.8(2)    |
| O2                                                                                                                                 | 8 j              | 0.0948(7)       | 0.0948(7) | 0.156(1)  | 1                    | 1.0(3)    |
| O3                                                                                                                                 | 8 j              | 0.4004(7)       | 0.4004(7) | 0.170(1)  | 1                    | 1.0(3)    |
| O4                                                                                                                                 | 8 j              | 0.2475(9)       | 0.2475(9) | 0.3582(3) | 0.5                  | 2.06(8)   |
| F1                                                                                                                                 | 8 j              | 0.2475(9)       | 0.2475(9) | 0.3582(3) | 0.5                  | 2.06(8)   |
| F2                                                                                                                                 | 4 f              | 0.2490(9)       | 0.2490(9) | 0         | 1                    | 0.72(8)   |
| Na1                                                                                                                                | 8 i              | 0.5156(7)       | 0.2360(9) | 0         | 0.8(1)               | 2.0(1)    |
| Na2                                                                                                                                | 8 i              | 0.8061(8)       | 0.037(1)  | 0         | 0.7(1)               | 5.9(4)    |

**Table S4:** Structural parameters obtained from Rietveld refinement of NVPFO<sub>2</sub> prepared from pyrophosphate source.

| NVPFO <sub>2</sub>                                                                                                                   |                  |                 |            |            |                      |           |
|--------------------------------------------------------------------------------------------------------------------------------------|------------------|-----------------|------------|------------|----------------------|-----------|
| S.G.: $P4_2/mnm$ ; $Z = 4$                                                                                                           |                  |                 |            |            | $R_{Bragg} = 5.05\%$ |           |
| $a = b = 9.03231(5) \text{ \AA}$ ; $c = 10.61917(7) \text{ \AA}$ ; $V = 866.339(9) \text{ \AA}^3$ ; $V/Z = 216.584(2) \text{ \AA}^3$ |                  |                 |            |            | $R_{wp} = 12.6\%$    |           |
|                                                                                                                                      |                  |                 |            |            | $\chi^2 = 53.8$      |           |
| atoms                                                                                                                                | Wyckoff position | atomic position |            |            | occ                  | $B_{iso}$ |
|                                                                                                                                      |                  | $x/a$           | $y/b$      | $z/c$      |                      |           |
| V                                                                                                                                    | 8 j              | 0.2483(2)       | 0.2483(2)  | 0.19913(8) | 1                    | 0.78(1)   |
| P1                                                                                                                                   | 4 d              | 0               | 0.5        | 0.25       | 1                    | 0.8(2)    |
| P2                                                                                                                                   | 4 e              | 0               | 0          | 0.2532(5)  | 1                    | 0.7(2)    |
| O1                                                                                                                                   | 16 k             | 0.0968(7)       | 0.4059(7)  | 0.1629(7)  | 1                    | 0.8(2)    |
| O2                                                                                                                                   | 8 j              | 0.0954(7)       | 0.0954(7)  | 0.154(1)   | 1                    | 0.6(2)    |
| O3                                                                                                                                   | 8 j              | 0.4017(7)       | 0.40174(6) | 0.17109(1) | 1                    | 1.4(3)    |
| O4                                                                                                                                   | 8 j              | 0.2483(7)       | 0.2483(7)  | 0.3508(3)  | 1                    | 1.275(1)  |
| F                                                                                                                                    | 4 f              | 0.2469(7)       | 0.2469(7)  | 0          | 1                    | 0.61(7)   |
| Na1                                                                                                                                  | 8 i              | 0.5120(6)       | 0.2331(7)  | 0          | 0.83(1)              | 1.12(1)   |
| Na2                                                                                                                                  | 8 i              | 0.7982(8)       | 0.025(1)   | 0          | 0.69(1)              | 5.57(4)   |

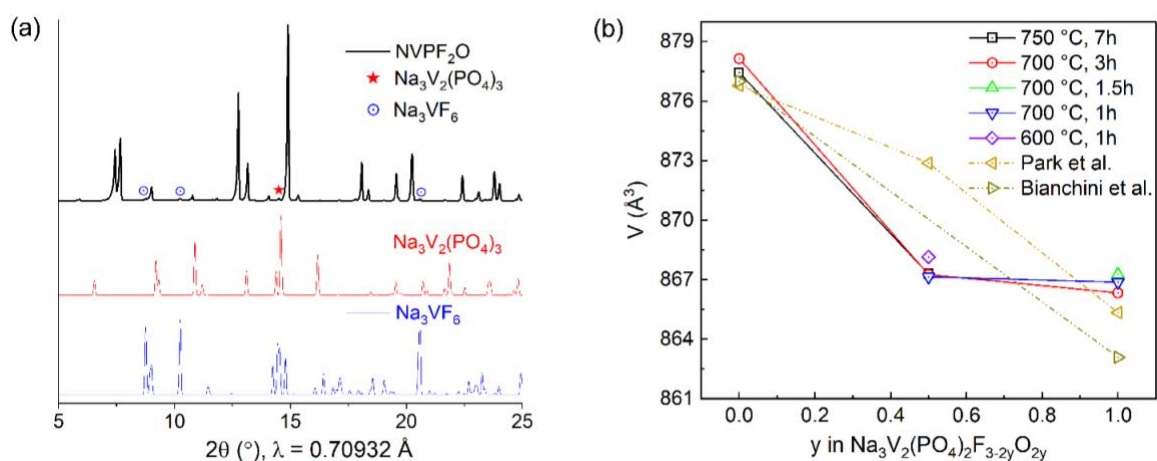

**Figure S2** (a) Powder X-ray diffraction pattern obtained when attempting to prepare NVPF<sub>2</sub>O from VOPO<sub>4</sub> source. The Na<sub>3</sub>V<sub>2</sub>(PO<sub>4</sub>)<sub>3</sub> and Na<sub>3</sub>VF<sub>6</sub> impurities are highlighted by red star and blue circled dot symbols, respectively. The red and blue indexations below the figure are for Na<sub>3</sub>V<sub>2</sub>(PO<sub>4</sub>)<sub>3</sub> and Na<sub>3</sub>VF<sub>6</sub>. (b) Lattice volume changes as a function of oxygen substitution for fluorine in NVPF<sub>3-2y</sub>O<sub>2y</sub> at various temperatures and times.

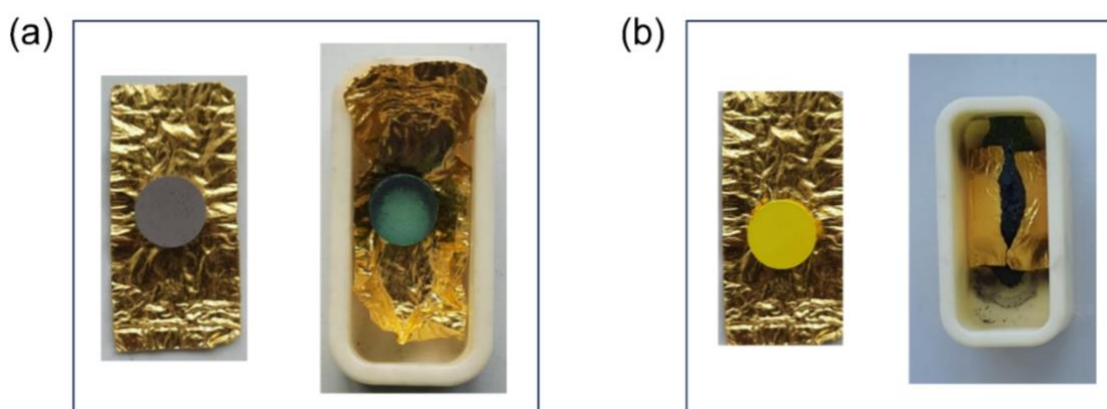

**Figure S3** (a) The photograph of the pellets before and after the reaction (heat treated at 700 °C for 1 h) for NVPFO<sub>2</sub> from (VO)<sub>2</sub>P<sub>2</sub>O<sub>7</sub> source. (b) The porous and significantly expanded NVPFO<sub>2</sub> sample obtained from synthesis reaction of VOPO<sub>4</sub> source after heat treated at 700 °C for 1 h.

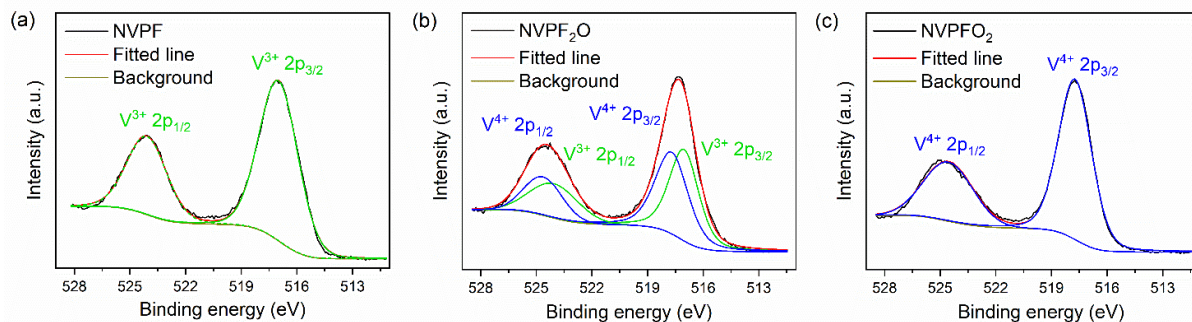

**Figure S4** Characterization of the oxidation state of  $\text{NVPF}_{3-2y}\text{O}_{2y}$  ( $y = 0, 0.5, 1$ ) samples. (a) XPS spectra of  $\text{V}^{3+} 2p_{3/2}$  and  $\text{V}^{3+} 2p_{1/2}$  energy levels in NVPF sample. (b) The appearance of both  $\text{V}^{3+} 2p$  and  $\text{V}^{4+} 2p$  modes in  $\text{NVPF}_2\text{O}$  sample. (c) XPS spectra of  $\text{V}^{3+} 2p_{3/2}$  and  $\text{V}^{3+} 2p_{1/2}$  energy levels in  $\text{NVPFO}_2$  sample.

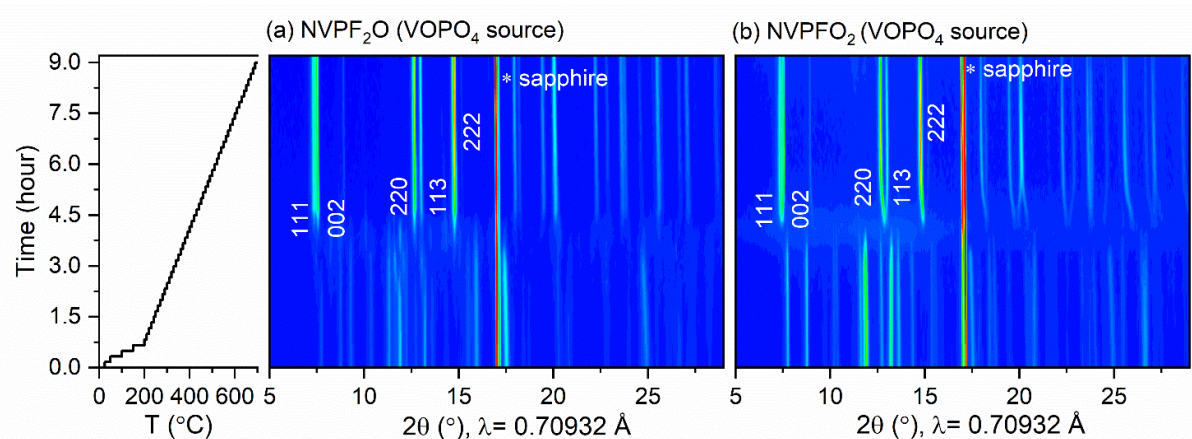

**Figure S5** *In situ* high-temperature x-ray diffraction patterns (in 2D contour plots) during the solid-state synthesis of (a)  $\text{NVPF}_2\text{O}$  from  $\text{VPO}_4$ ,  $\text{VOPO}_4$ ,  $\text{NaF}$ , and  $\text{Na}_2\text{CO}_3$  (eq.4), (b)  $\text{NVPFO}_2$  from  $\text{VOPO}_4$ ,  $\text{NaF}$ , and  $\text{Na}_2\text{CO}_3$  mixture (eq.5). (Left) Temperature ramps used over time. The temperature range was from 25 to 700 °C.

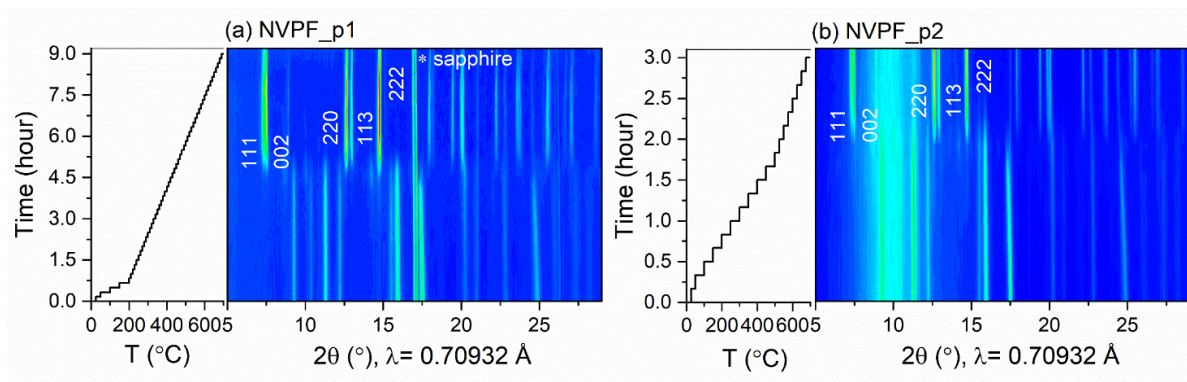

**Figure S6** *In situ* high-temperature X-ray diffraction patterns (in 2D contour plots) during the solid-state synthesis of (a) NVPF\_p1 from VPO<sub>4</sub> (V<sub>2</sub>O<sub>5</sub>, ThermoFisher Scientific; >99.99%) and NaF (abcr GmbH; 99.995%). (Left) Temperature ramps used over time. The temperature range was from 25 to 700 °C. (b) NVPF\_p2 from VPO<sub>4</sub> (V<sub>2</sub>O<sub>5</sub>, Sigma-Aldrich Co. Ltd.; 99.95%) and NaF (Grüssing GmbH; >99.0%). (Left) Temperature ramps used over time. The temperature range was from 25 to 700 °C. Note that this experiment was done with quartz rather than sapphire capillary, hence the different background.



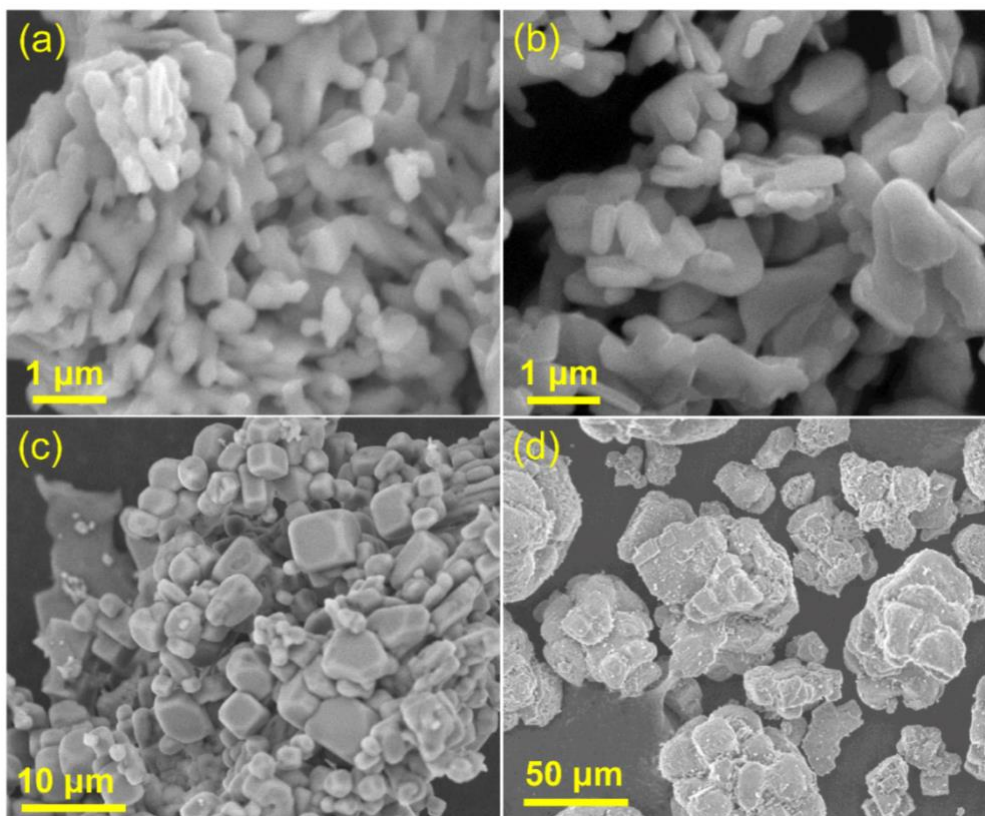

**Figure S7** Scanning electron microscopy images of (a)  $V_2O_5$ , ThermoFisher Scientific; >99.99%, (b)  $V_2O_5$ , Sigma-Aldrich Co. Ltd.; 99.95%, (c) NaF, abcr GmbH; 99.995%, (d) NaF, Grüssing GmbH; >99.0%). The average particle sizes of  $V_2O_5$  are in the range of 500 nm to 1  $\mu\text{m}$  (ThermoFisher Scientific; >99.99%), and 1 to 2  $\mu\text{m}$  (Sigma-Aldrich Co. Ltd.; 99.95%) for NVPF\_p1 and NVPF\_p2, respectively, while the corresponding values for NaF are in the range of 1 to 5  $\mu\text{m}$  (abcr GmbH; 99.995%), and 20 to 25  $\mu\text{m}$  (Grüssing GmbH; >99.0%) for NVPF1 and NVPF2, respectively.

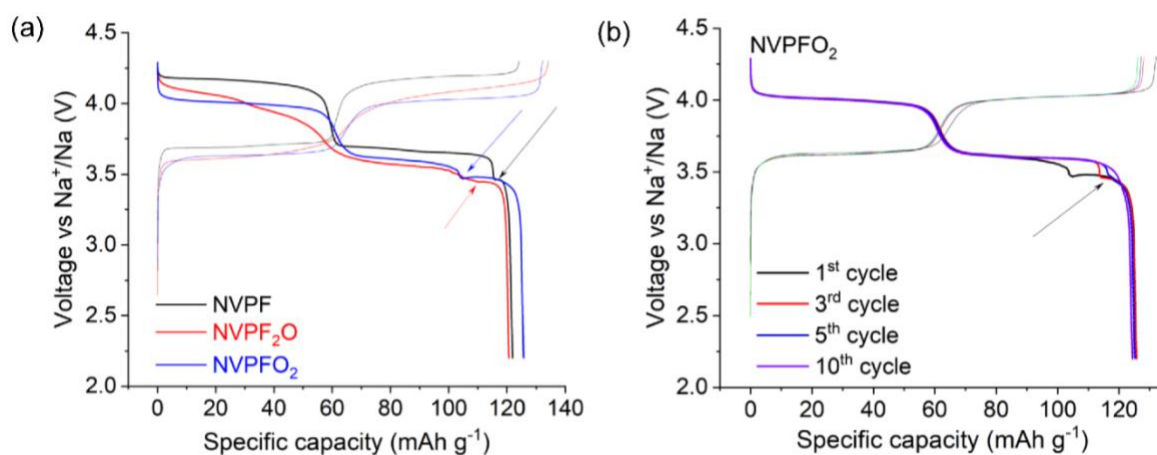

**Figure S8** 1<sup>st</sup> cycle charge-discharge profiles at C/20 for NVPF, NVPF<sub>2</sub>O, and NVPFO<sub>2</sub> prepared from (VO)<sub>2</sub>P<sub>2</sub>O<sub>7</sub> source. The arrow signs around 3.4 V indicate small voltage steps during discharge. (b) 1, 3, 5 and 10<sup>th</sup> cycle charge-discharge profiles at C/20 for NVPFO<sub>2</sub> cathode. The arrow sign around 3.4 V indicates voltage step at 1, 3 and 5<sup>th</sup> cycles before completely disappearing at 10<sup>th</sup> cycle.

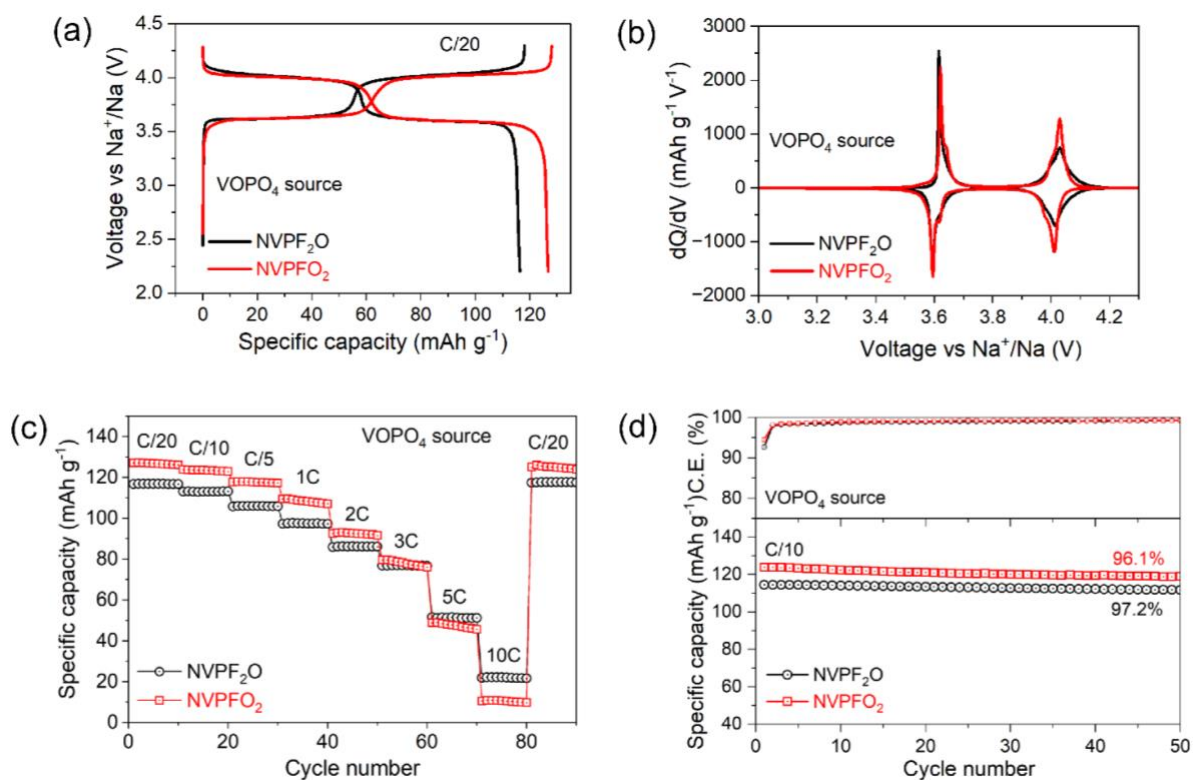

**Figure S9** Electrochemical performances of NVPF<sub>3-2y</sub>O<sub>2y</sub> (y = 0.5, 1) samples prepared from VOPO<sub>4</sub> source in 2.2-4.3 V vs Na<sup>+</sup>/Na. (a) potential profiles for the 10<sup>th</sup> cycles at C/20 rate, (b) corresponding derivative curves for the 10<sup>th</sup> cycles, (c) rate performance, and (d) cycling performance at C/10 rate.

### Note 1. Kinetic Properties: Diffusion rate from CV Rate Test

Regarding electrode kinetics, we also measured cyclic voltammetry for our electrode materials. The linear relationship between  $i_p$  and  $v^{1/2}$  confirms diffusion-controlled behaviour in all the electrodes. The  $\text{Na}^+$  diffusion coefficients ( $D_{\text{Na}}$ ) are calculated using the Rendles-Sevcik equation as follows.

$$\frac{i_p}{m} = 0.4463 \left( \frac{F^3}{RT} \right)^{1/2} n^{3/2} A D^{1/2} C v^{1/2} \quad \dots \quad (1)$$

Where  $i_p$  is the peak current,  $m$  is the active mass (3.36, 3.92, and 3.36 mg for NVPF, NVPF<sub>2</sub>O, and NVPFO<sub>2</sub>, respectively)  $F$  is the Faraday constant (= 96,485 C mol<sup>-1</sup>),  $R$  is the gas constant (8.314 J K<sup>-1</sup> mol<sup>-1</sup>),  $T$  is the absolute temperature (298.15 K),  $n$  is the number of electrons per molecule involved in the reaction (=2),  $A$  is the active surface area of the cathodes (~0.50265 cm<sup>2</sup>),  $C$  is the molar concentration of sodium ions in the electrodes (calculate as 0.022685, 0.022845, 0.022997 mol cm<sup>-3</sup> for NVPF, NVPF<sub>2</sub>O, and NVPFO<sub>2</sub>, respectively).

The diffusion coefficients for the different electrodes are tabulated as follows.

**Table S5:** Diffusion coefficients extracted from the CV curves of Figure S10.

| Electrode           | Cathodic peaks |                       |                       | Anodic peaks |                       |                       |
|---------------------|----------------|-----------------------|-----------------------|--------------|-----------------------|-----------------------|
|                     | Slope          | $D_{\text{avg}}$      |                       | Slope        | $D_{\text{avg}}$      |                       |
| NVPF                | 0.63(1)        | $5.28 \times 10^{-9}$ |                       | 0.59(6)      | $4.63 \times 10^{-9}$ |                       |
| NVPF <sub>2</sub> O | 0.56(3)        | 0.85(1)               | $1.35 \times 10^{-8}$ | 0.52(7)      | 0.60(1)               | $8.28 \times 10^{-9}$ |
| NVPFO <sub>2</sub>  | 0.74(2)        | 0.95(3)               | $1.86 \times 10^{-8}$ | 0.6(1)       | 0.80(1)               | $1.29 \times 10^{-8}$ |

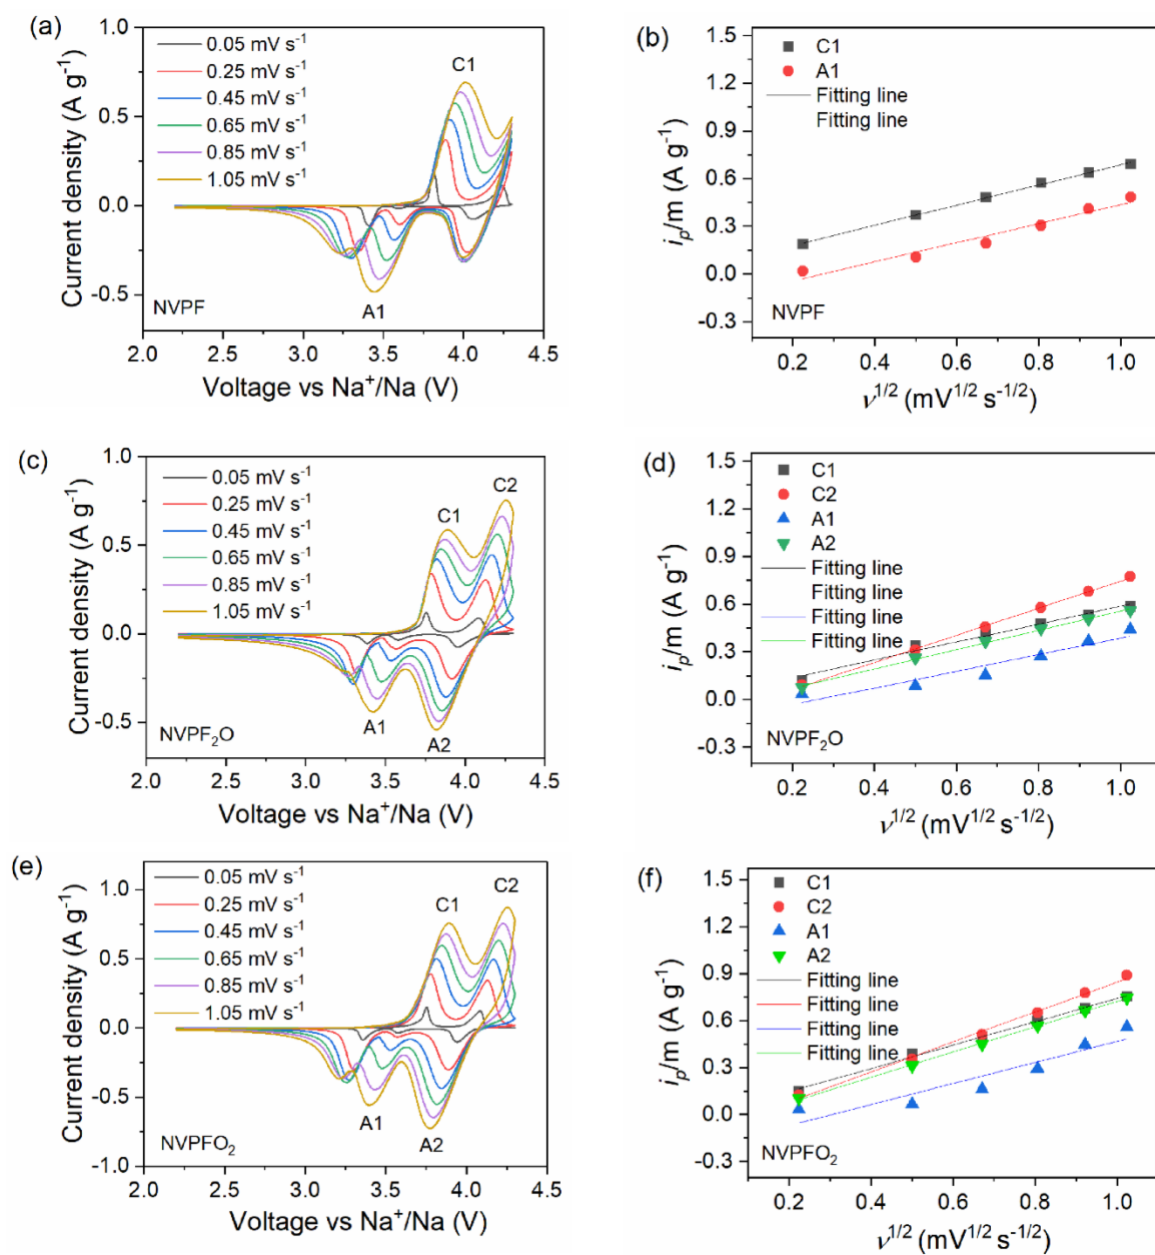

**Figure S10:** Cyclic voltammograms at 0.05–1.05  $\text{mV s}^{-1}$  and corresponding peak current density ( $i_p/m$ ) vs square root of the scanning rate ( $v^{1/2}$ ): (a-b) NVPF electrode, (c-d) NVPF<sub>2</sub>O electrode and (e-f) NVPFO<sub>2</sub> electrode.

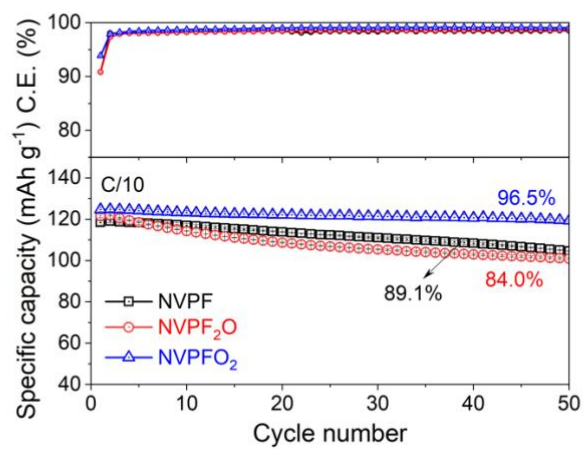

**Figure S11** Electrochemical cycling performance of NVPF<sub>3-2y</sub>O<sub>2y</sub> (y = 0, 0.5, 1) cathodes in 2.2-4.3 V vs Na<sup>+</sup>/Na at C/10 rate. Cells were cycled in duplets.
